# Supplementary material for: Genetic Assignment Methods for Gaining Insight into the Management of Infectious Disease by Understanding Pathogen, Vector, and Host Movement
Source: PubMed Central journal article supplement (PMC3084202; doi:10.1371/journal.ppat.1002013), 2011-04-28

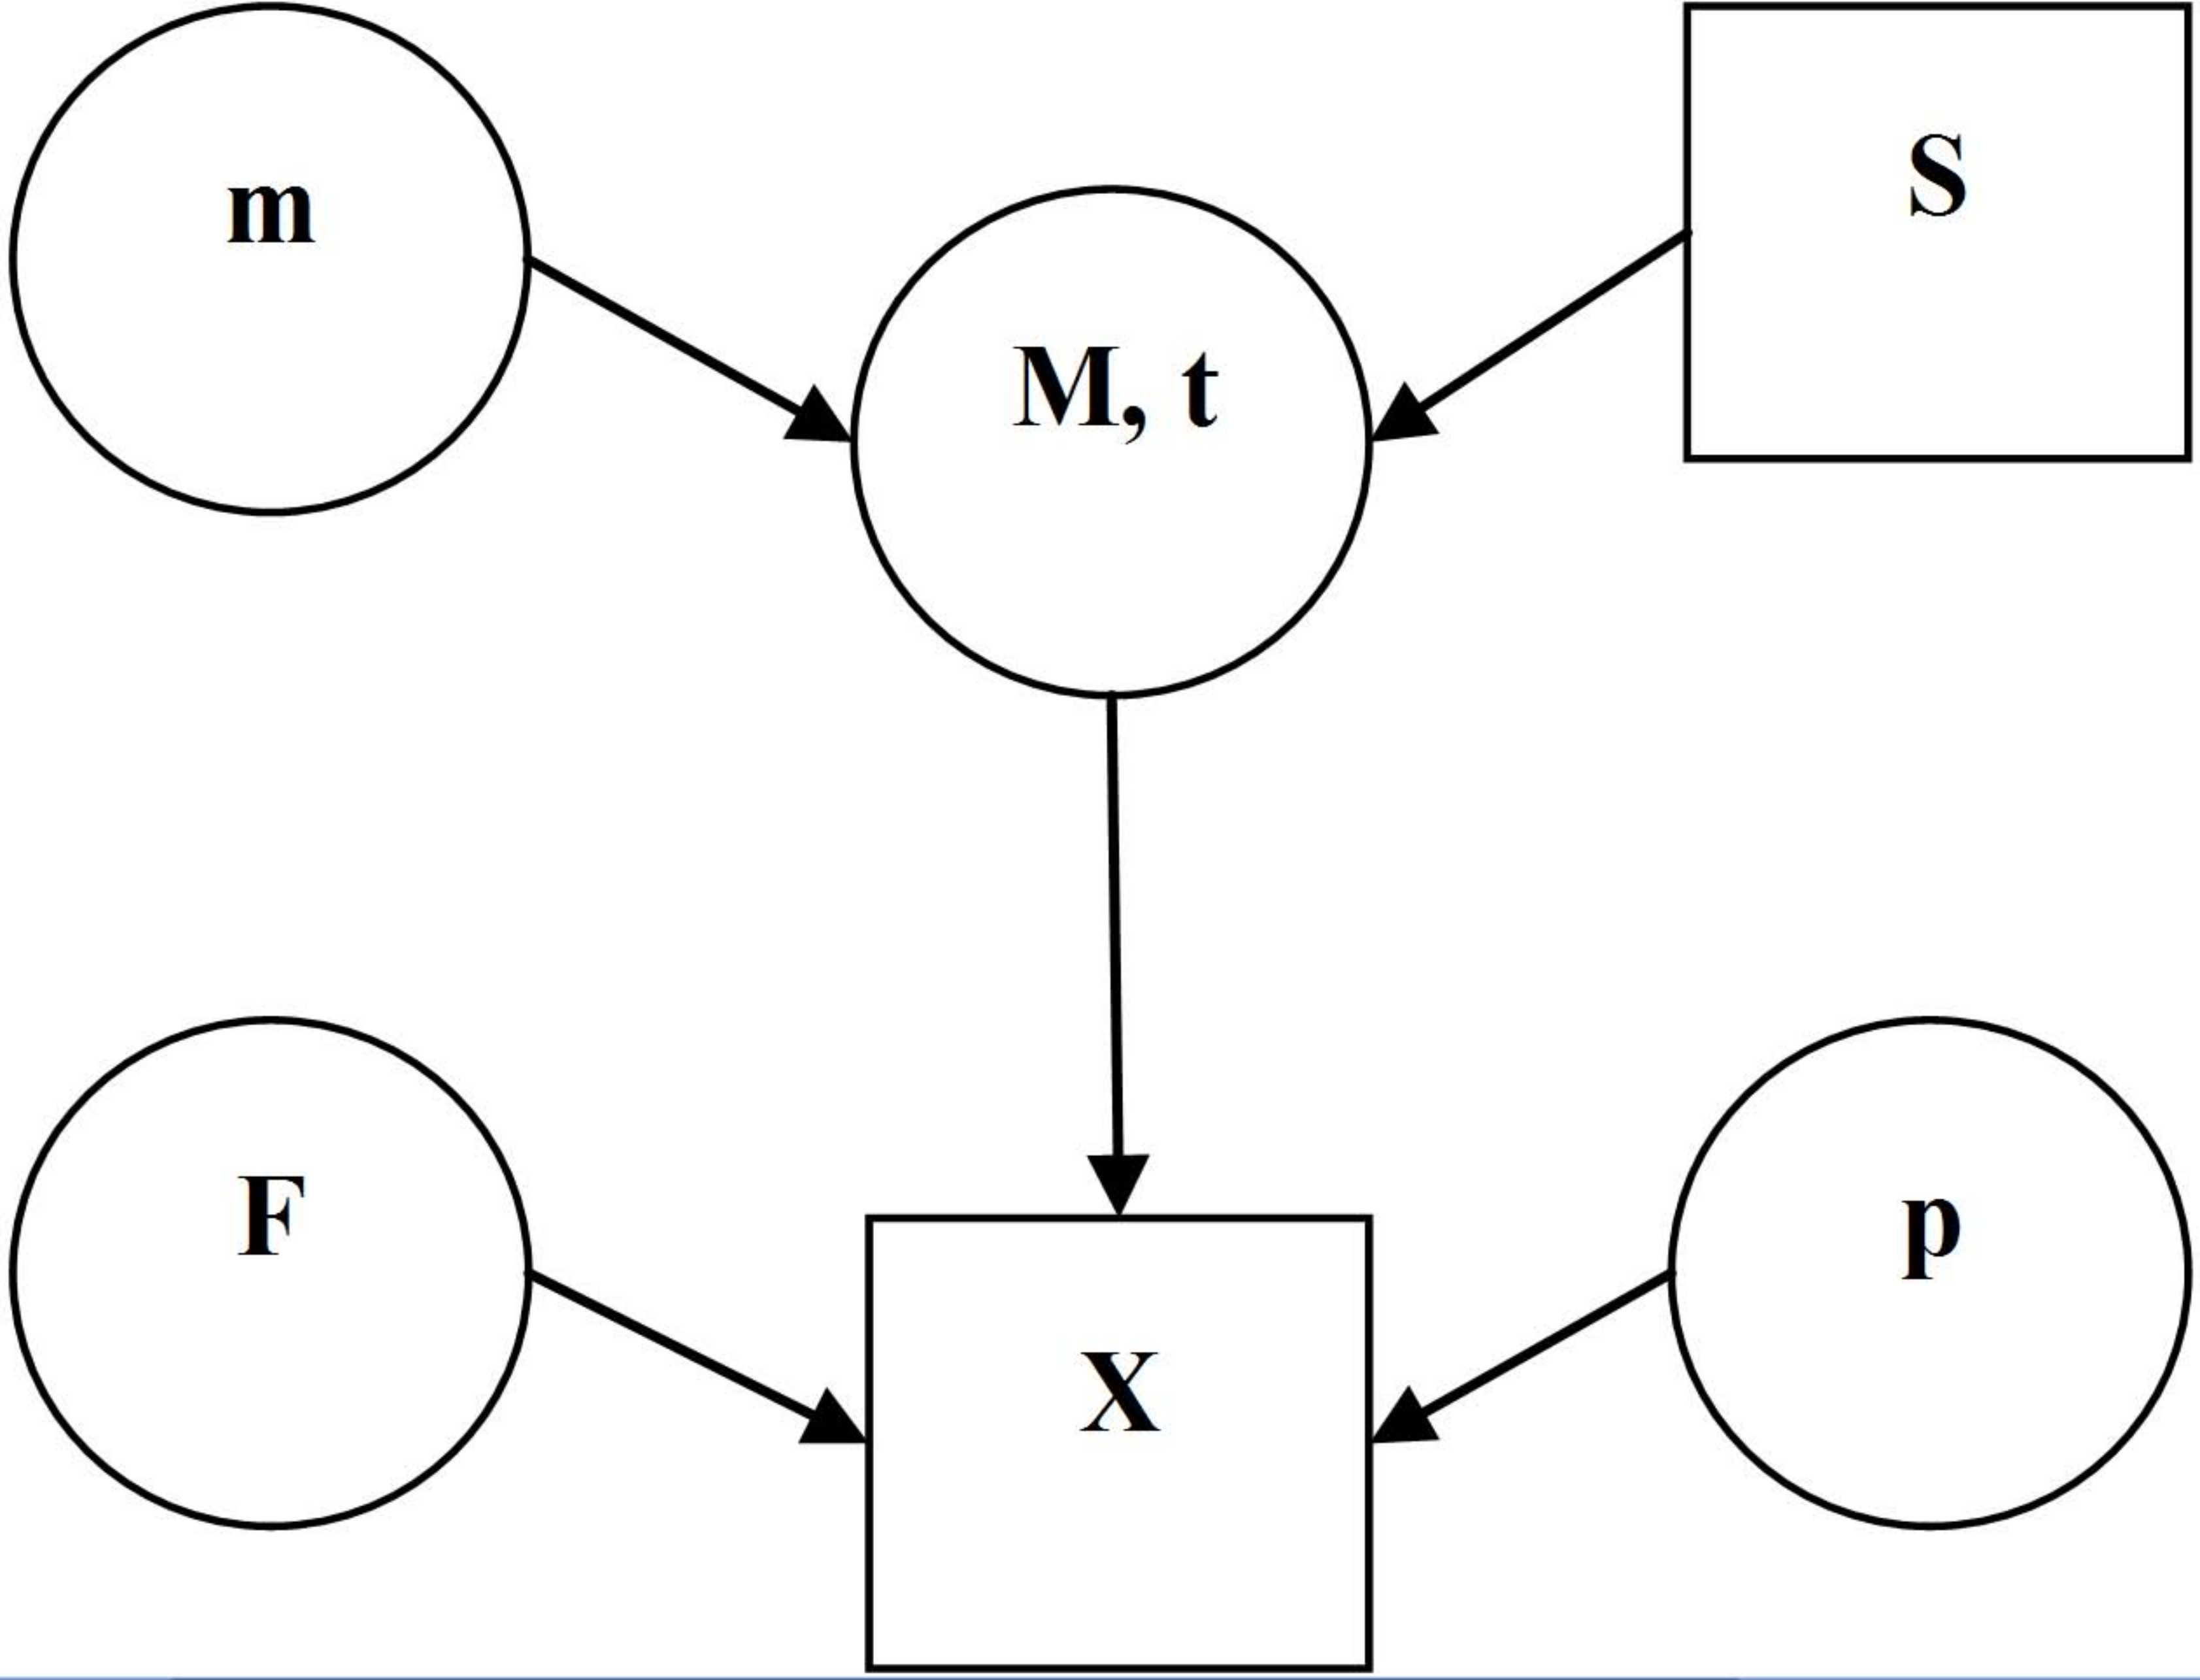

Supplement: ppat.1002013.s001.pdf [file ppat.1002013.s001.pdf]
