# Supplementary material for: Genetic Assignment Methods for Gaining Insight into the Management of Infectious Disease by Understanding Pathogen, Vector, and Host Movement
Source: PubMed Central journal article supplement (PMC3084202; doi:10.1371/journal.ppat.1002013), 2011-04-28
Supplement: ppat.1002013.s002.pdf [file ppat.1002013.s002.pdf]

## Supporting Information – Table S1

Table S1. Data and parameters of the inference model implemented in Wilson and Rannala's [1] Bayesian assignment test.

|                                          | Variable | Set notation  | Description                                                                             |
|------------------------------------------|----------|---------------|-----------------------------------------------------------------------------------------|
| <b>Observed variables (data)</b>         |          |               |                                                                                         |
| Source populations                       | <b>S</b> | $\{S_h\}$     | $S_h$ is the population from which individual $h$ was sampled                           |
| Genotypes                                | <b>X</b> | $\{X_{hj}\}$  | $X_{hj}$ is the genotype of individual $h$ at locus $j$                                 |
| <b>Unobserved variables (parameters)</b> |          |               |                                                                                         |
| Migration rates                          | <b>m</b> | $\{m_{lq}\}$  | $m_{lq}$ is fraction of individuals in population $q$ that migrated from population $l$ |
| Migrant ancestry                         | <b>M</b> | $\{M_h\}$     | $M_h$ is the source of migrant ancestry of individual $h$                               |
| Time of migration                        | <b>t</b> | $\{t_h\}$     | $t_h$ is the generation at which a migrant ancestor of individual $h$ arrived           |
| Population allele frequencies            | <b>P</b> | $\{p_{ijl}\}$ | $p_{ijl}$ is the frequency of allele $i$ at locus $j$ in population $l$                 |
| Inbreeding coefficient                   | <b>F</b> | $\{F_l\}$     | $F_l$ is the inbreeding coefficient for population $l$                                  |

1. Wilson, G. and B. Rannala, *Bayesian Inference of Recent Migration Rates Using Multilocus Genotypes*. *Genetics*, 2003. **163**: p. 1177-1191.
