# Supplementary material for: Genetic Assignment Methods for Gaining Insight into the Management of Infectious Disease by Understanding Pathogen, Vector, and Host Movement
Source: PubMed Central journal article supplement (PMC3084202; doi:10.1371/journal.ppat.1002013), 2011-04-28
Supplement: ppat.1002013.s003.pdf [file ppat.1002013.s003.pdf]

## **Supporting Information – Table S2**

**Table S2. Descriptions of different types of genetic markers and the corresponding advantages and disadvantages when analyzed using assignment tests.**

| <b>Genetic Marker</b>                           | <b>Description</b>                                                                         | <b>Advantages</b>                                                                                                    | <b>Disadvantages</b>                                                                                                                                                              |
|-------------------------------------------------|--------------------------------------------------------------------------------------------|----------------------------------------------------------------------------------------------------------------------|-----------------------------------------------------------------------------------------------------------------------------------------------------------------------------------|
| Allozymes                                       | Different forms of the same enzyme coded at the same locus                                 | Straightforward and relatively cheap.                                                                                | Low levels of polymorphism. Require frozen tissue                                                                                                                                 |
| Microsatellites                                 | Tandem repeats of 1-6 base pairs of DNA, flanked by unique sequence for primer design      | Highly polymorphic. Easily reproducible. Amenable to many forms of analysis.                                         | Relatively high cost of development (need prior sequence data) and of genotyping. Requires calibration if different labs work on the same organism.                               |
| Single nucleotide polymorphisms (SNPs)          | Variants at a single base position.                                                        | Abundant in genome. Can be scored from poor-quality DNA. Platforms exist for cheap automated genotyping at many loci | Limited polymorphism (generally bi-allelic). Relatively high cost of development (need prior sequence data). Need to genotype at many loci. No calibration required between labs. |
| Amplified Fragment Length Polymorphisms (AFLPs) | Differing locations of restriction sites produce DNA fragments of different lengths in PCR | Inexpensive. Generally high levels of polymorphism and of repeatability. No prior sequence data required.            | Cannot assign any band to a particular locus, thus limiting analysis. Optimization can be tedious.                                                                                |
